# Supplementary material for: Water in the Critical Zone: Soil, Water and Life from Profile to Planet
Source: Copernicus journal article supplement (doi:10.5194/soil-2016-50), 2016-08-11
Supplement: Supplementary file [file soil-2016-50-AC1-supplement.pdf]

# 1 **Water in the Critical Zone: Soil, Water and Life from Profile to Planet**

2 M.J. Kirkby

3 School of Geography, University of Leeds, UK.

4 m.j.kirkby@leeds.ac.uk

5

## 6 **Abstract**

7 Earth is unique in the combination of abundant liquid water, plate tectonics and life,  
8 providing the broad context within which the critical zone exists, as the surface skin of the  
9 land. Global differences in the availability of water provide a major control on the balance of  
10 processes operating in the soil, allowing the development of environments as diverse as those  
11 dominated by organic soils, by salty deserts or by deeply weathered lateritic profiles. Within  
12 the critical zone, despite the importance of water, the complexity of its relationships with the  
13 soil material continue to provide many fundamental barriers to our improved understanding,  
14 at the scales of pore, hillslope and landscape. Water is also a vital resource for the survival of  
15 increasing human populations. Intensive agriculture first developed in semi-arid areas where  
16 the availability of solar energy could be combined with irrigation water from more humid  
17 areas, minimising the problems of weed control with primitive tillage techniques. Today the  
18 challenge to feed the world requires improved, and perhaps novel ways to optimize the  
19 combination of solar energy and water at a sustainable economic and environmental cost.  
20  
21  
22  
23

## 24 **1. Water and critical zone typology**

25 The earth provides a unique planetary environment in which liquid water, plate tectonics and  
26 life have co-evolved to create the critical zone. Many of the interconnected processes are well  
27 known, and described in greater detail elsewhere (e.g. Jacobson et al, 2000): the present  
28 review focusses on the role of water within the soil system. ~~Our Human~~ existence relies on  
29 the properties of this dynamic soil layer and the ways in which water helps to maintain and  
30 regenerate the ecosystem services that it provides. Soil properties have been described  
31 (Jenny, 1941) as depending on climate, biota, relief, parent material and time (Jenny, 1941).  
32 Although not explicit in this list, water plays a vital part in almost all soil processes,  
33 mediating their dependence on these five factors. In figure 1, the factors most directly linked  
34 to soil development have been re-arranged to show the central role played by water in soil  
35 processes (Hillel, 1971). ~~Although Climate and~~ parent material may be regarded as the  
36 most nearly independent external controls on soil development, and atmospheric exchanges  
37 somewhat less so, while ~~may be regarded as the (semi-)independent external controls on soil~~  
38 ~~development~~; water plays a vital role as an intermediary, especially between climate, biota  
39 and soil. The close interdependence of all these processes demands multidisciplinary  
40 research (Brevik et al, 2015) to deepen our understanding.

41  
42 The availability of water depends on the climate, defining the amount of precipitation, its  
43 form, seasonality and variability from year to year. Water typically spends months (soil  
44 water) to centuries (groundwater) within the critical zone, allowing it to interact effectively  
45 with soil and bedrock constituents. The areal distribution and seasonal pattern of rainfall and  
46 evapotranspiration are, therefore, ~~perhaps~~ the strongest global scale controls on critical zone  
47 development.

48  
49 Water in the soil provides ~~an~~ the essential working fluid for plant growth, being directly  
50 involved in photosynthesis and providing turgor, and is vital for all organisms in the soil

51 (Bardgett et al, 2001). The way in which biota interact with and influence the critical zone is  
52 strongly linked to the intensity of water circulation through living organisms. Where water is  
53 freely available, and potential evapotranspiration is high, biomass is generally high, including  
54 both vegetation and soil organisms. Decaying vegetation provides soil organic matter and  
55 also provides an important resource for the soil organisms that enhance decomposition, as  
56 well as a dynamic reservoir for soil water.

57  
58 Water, flowing water, wetting and drying, freezing and thawing all acting with gravity,  
59 drives many mechanisms that physically move soil grains and aggregates and aggregates to  
60 transport the soil, progressively modifying the topography, and so the way in which the  
61 critical zone interacts with relief. As relief is progressively lowered, sediment transport is  
62 generally less reduced, due to the lower potential energy of overland and subsurface flow,  
63 whereas chemical removal is much less affected by the slower water drainage and water  
64 circulation remain important. This trend generally leads to a deeper and more weathered  
65 critical zone as relief is lowered, which progressively modifies modifying the soil structure  
66 and the pathways of water moving over and through the soil, and with organisms actively  
67 exploiting the system to their advantage. Within-slope effects are also observed as sediment  
68 and organic matter is transferred from upslope to downslope sites, particularly through tillage  
69 erosion (e.g. Wright et al, 1990, van Oost et al, 2005).

70  
71 Water interacts with nutrients and weathering products, and its flow redistributes dissolved  
72 material. Water in the parent material acts as solute, dissolving weatherable minerals and  
73 making them available for advective transport in flowing water and diffusive transport in  
74 immobile water (Kirkby 1985). In arid conditions, material dissolved from parent material or  
75 deposited in the wind is often re-precipitated within the profile as, for example, sodium salts  
76 or calcrete. In humid conditions, solutes are largely carried away, progressively weathering  
77 the residual soil.

78  
79 Over time, the critical zone progressively evolves over similar time spans to the evolution of  
80 the entire landscape. In some shield areas, this process appears to continue for many tens of  
81 millions of years, but, more commonly the critical zone appears to approaches a near steady  
82 state of almost constant mechanical and chemical denudation in which the structure and form  
83 of the critical zone is only very slowly changing while the landscape is continuously lowered  
84 at a steady rate (Riebe et al, 2003) over time spans of  $10^4$ - $10^5$  years. Until it reaches such a  
85 steady state, (The critical zone is in a state of transient change until it reaches a steady state,  
86 or either in response to external shocks such as deforestation and climate change, or through  
87 the slow evolutionary changes in vegetation. Human population growth and technical  
88 development are applying many other stresses that seem to threaten the maintenance of stable  
89 earth systems, violating the planetary boundaries within which humanity can safely operate  
90 (Steffen et al, 2015). During such periods of transience or instability, many of the most  
91 immediate changes in internal processes are strongly driven by changes in soil hydrology-

92  
93 At a global scale, the dominant control on soil development is the balance between climate  
94 and atmospheric inputs. Climate controls the overall soil hydrology, that can be expressed by  
95 the relationship between precipitation and potential evapotranspiration. Atmospheric mineral  
96 inputs or outputs are partially dependent on the climate. Dust is perhaps the most important  
97 single mineral component, source areas being associated with little vegetation cover and at  
98 least some dry periods when the surface material can be entrained. Desert areas are the most  
99 important source areas, but current and former glacial outwash areas are also  
100 important/significant, currently generating about 10% of the global dust budget (Bullard,

Formatted: Superscript

Formatted: Superscript

101 2013). Areas downwind of source areas receive dust, which is widespread globally, but most  
102 concentrated close to source areas due to selective transportation of silt-sized material.  
103 Particularly high concentrations form the areas of extensive loess accumulation, for example  
104 in China, northern Europe and the American Mid-west. Other significant atmospheric  
105 exchanges are associated with ~~transport-erosion and deposition~~ of inorganic salts that are  
106 most concentrated close to the ocean or exposed evaporate deposits (themselves more  
107 prevalent in current or former arid areas). The relative importance of atmospheric inputs as  
108 agents of soil formation is strongly dependent on the hydrological balance, between  
109 precipitation and evapotranspiration. (FAO, 1961; Prentice et al, 1992) In figure 2, the  
110 hydrological balance is compared with the atmospheric exchange balance to define broad  
111 regimes of soil development. Where the hydrological balance is very strongly positive  
112 (precipitation greater than potential evapotranspiration) throughout the year, then organic  
113 material accumulates at the surface and persistent waterlogging creates anoxic conditions that  
114 minimise decomposition of organic matter, which accumulates as an organic soil. With a less  
115 positive and/or more seasonal hydrological balance, the critical zone is dominated by loss of  
116 dissolved weathering products and, given sufficient time, develops a deeply weathered  
117 profile, often lateritic. Once almost all nutrients have been leached from the upper layers of  
118 soil, plants may eventually become largely dependent on atmospheric inputs of nutrients  
119 dissolved in rainfall.

120  
121 Under arid conditions, where the hydrological balance is negative, most of the precipitation  
122 that enters the soil is lost in evapotranspiration, re-depositing any products of chemical  
123 weathering within the soil, most frequently as calcrete layers, in some cases increased  
124 through inputs of wind-blown dust. Extremely arid areas provide ideal conditions for  
125 deflation, and, at the extremes, tend towards a rocky desert from which all fines near the  
126 surface have been removed. If, however, there is accumulation of salts, from the sea or from  
127 evaporites, then surfaces are instead dominated by salt accumulation and undergo rapid  
128 weathering as salts crystallise within the rock (Lavee et al, 1998; Howell, 2009).

129  
130 Thus, at a global scale, water relations ~~dominate the whole course of evolution~~ provide the  
131 strongest control on evolution of the critical zone. Important differences are, however, also  
132 due to ~~Some of these gross differences are modified by the different the~~ age of soils, for  
133 example allowing accumulation of weathering products throughout the Cainozoic in some  
134 low latitude shield areas, and incomplete re-cycling of material in ~~with more rapid re-cycling~~  
135 ~~in~~ areas of Pleistocene glaciation, ~~and opportunities for the accumulation of weathering~~  
136 ~~products throughout the Cainozoic in some low latitude shield areas.~~ However, Observed  
137 differences also reflect differences in parent materials (e.g. Dere et al, 2010; Vitousek et al,  
138 2016).

139  
140 Although there are many alternative ways of conceptualizing the relationships between water  
141 and soil, the development of the critical zone concept has perhaps done more than any other  
142 to transform the study of the soil and to emphasise its essentially multidisciplinary nature  
143 (Brantley et al, 2007; Lin 201; Anderson & Anderson, 2010; Anderson, 2012; Brevik et al,  
144 2015). ~~Although,~~ inevitably, some aspects of this re-focussing overlap with existing  
145 components of earth science, the establishment of Critical Zone Observatories (CZOs), first  
146 in the United States (Anderson et al, 2008) and now internationally (Banwart et al, 2012), is  
147 doing much to foster new research and improve our understanding of how soil is related to  
148 the landscape at hillslope to global scales.

149  
150

151 **2. Movement of water within the critical zone**

152 At finer scales, the relationships between water and soil are in the domain of soil hydrology  
153 and soil physics. In both of these fields, there are many questions that are not fully resolved  
154 and, because of their importance, a considerable literature.

155  
156 At the finest scale, flow of water within the soil is most commonly described by the Richards  
157 (1931) equation, re-stating, for an unsaturated soil, Darcy's (1856) law that the rate of flow is  
158 proportional to the pressure gradient. ~~There are a number of challenges in interpreting the  
159 Richards equation for a real soil. The first difficulty is that, in these expressions, the  
160 hydraulic potential is a measure of the capillary tension exerted by films of water held  
161 between soil grains and aggregates, and that this tension depends not only on the moisture  
162 content, but also on the previous history of wetting and drying. With measurements of the  
163 relationships between soil moisture and tension (Buckingham, 1907), it is possible to solve  
164 these equations in simple cases, such as for saturated infiltration into an initially dry soil  
165 (Youngs, 1957), but more general solutions are elusive. One useful approach has been to  
166 focus on the infiltration process, to develop expressions that were broadly consistent with  
167 the Richards equation, but relied on fewer parameters (Philip, 1954, 1969; Green & Ampt,  
168 1911).~~

169  
170 However, the Darcy/Richards approach assumed that as flow passes through the soil, there is  
171 complete mixing between the flowing threads of water, and there are commonly substantial  
172 deviations from this assumption, because pore sizes and shapes vary, so that water travels  
173 faster through macropores when close to saturation, bypassing flow through the finer pores of  
174 the soil matrix (Beven and Germann, 1982, 2013). Macropores are widespread, due to the  
175 contrast in pore sizes between and within individual soil aggregates, as well as more extreme  
176 contrasts produced by cracking in clay-rich soils and open pore spaces around stones in the  
177 soil. In some cases the behaviour of the soil can be dominated by flow in either the matrix or  
178 the macropores, but this response varies with the moisture content as well as over time in  
179 swelling soils. In many cases therefore a more complex model is required, for example  
180 involving dual porosity and marked hysteresis. Experimental evidence is showing the  
181 intricate three dimensional patterns of wetting and draining in a block of soil (e.g. Weiler &  
182 Naef, 2003; Haber-Pohlmeier et al, 2009) but, to date, there is no simple model that  
183 adequately describes the range of observed behaviours. Simple infiltration equations are still  
184 being applied as a necessary phenomenological tool, but it is clear that they can only  
185 represent a single prior soil state, for example ponded infiltration into an initially dry soil.

186  
187 Unsaturated flow in the soil takes place predominantly in the vertical direction, as rainfall  
188 percolates toward a saturated level (if there is one) where lateral flow occurs, predominantly  
189 in the saturated phase. This contrast reflects the lower hydraulic gradient and the much larger  
190 distances involved in lateral flow, so that only saturated flow is able to drive significant  
191 volumes of water.

192  
193 Under climates, and during seasons, where precipitation is less than potential  
194 evapotranspiration the movement of water is predominantly vertical: infiltrating water  
195 supplies evapotranspiration, only penetrating deeply into the soil in the largest storms, and  
196 there is little or no surplus to drive lateral flow. When precipitation exceeds potential  
197 evapotranspiration, the excess can only be carried away by lateral flow, which may be  
198 overland, within the soil or in groundwater. This dichotomy, often with seasonal switching  
199 between these modes (Grayson et al, 1997), shows strong contrasts in the downslope  
200 connectivity that is established by lateral flow. In a place and season dominated by vertical

201 fluxes, each point responds independently to the rainfall supply and evapotranspiration  
202 demand, and common responses are filtered by local heterogeneities. Lateral connectivity is  
203 only briefly established during relatively infrequent flow events, usually overland, so that, in  
204 general, behaviour at a point responds only to very local influences. Where lateral flow is  
205 dominant, there is a near-continual connection, commonly subsurface, and the hydrological  
206 response at any point integrates the effects of every point upslope that drains towards it.

207  
208  
209 At the soil surface, overland flow is generated either when rainfall exceeds the infiltration  
210 capacity (Horton, 1933) or when the surface soil is saturated (Hewlett & Hibbert, 1967;  
211 Dunne & Leopold, 1975; Kirkby, 1978; Beven, 2000). The former, infiltration excess  
212 overland flow, is dominant in semi-arid areas where rainfall exceeds potential  
213 evapotranspiration so that the soil is dry. Rainfall impact crusts the bare soil surface around  
214 the sparse vegetation, while shrubs may funnel water towards their roots (Cammaraat et al,  
215 2010) setting up a strongly contrasting patchwork of infiltration. The latter, saturation excess  
216 overland flow, occurs mainly in humid areas, where rainfall is greater, generating substantial  
217 subsurface flow and a strong vegetation cover. However under many Mediterranean and  
218 other seasonal climates, there is switching between these modes during the year and, even in  
219 humid areas, and particularly where cultivated fields are bare for part of the year, extreme  
220 rainfalls may generate infiltration excess overland flow. When saturated overland flow  
221 occurs, the contributing area commonly expands as saturation builds outward from stream  
222 banks and stream-head hollows, driven by concentration of subsurface flow from upslope and  
223 the accumulation of rainfall on the nearly saturated ground. Infiltration excess overland flow,  
224 when it occurs, tends to be generated more uniformly, so that flows, when they occur, tend to  
225 be more flashy and more damaging. However, there remains a very strong variability in local  
226 infiltration capacity, so that, particularly at the beginning of a storm, the detailed pattern of  
227 overland flow is characterised by patches of flow generation and re-infiltration which persist  
228 until flow becomes general (Kirkby, 2014) and is then dominated by local flow convergence  
229 steered by the micro-topography (figure 3).

230  
231  
232 In humid areas, particularly under forest, there is an extensive literature (e.g. Barthold &  
233 Woods, 2015), on subsurface flow mechanisms. There appears (Tromp-van Meerveld and  
234 McDonnell, 2006) to be strong similarity in many cases between the mechanisms of  
235 subsurface flow and those of infiltration excess overland flow. In each case, rainfall fills  
236 depressions and/or infiltration storage and flow begins as these progressively spill over to  
237 form connections. The surface for which this process is most critical may be the ground  
238 surface (for infiltration excess overland flow), or a subsurface level below which there is a  
239 sharp decrease in permeability, whether due to soil layering or at the soil-bedrock interface.  
240 Experimental (e.g. Graham et al, 2010) and modelling data (e.g. Kirkby 2014, Penuela et al,  
241 2015) supports percolation theory (e.g. Wikipedia 2016 Stauffer & Aharony, 1985; Ali et al,  
242 2013) in finding that the response of such a system to increasing rainfall amounts shows a  
243 rather sharp threshold, below which there is negligible flow, and above which there is  
244 transition to a near-linear increase in connected flow. Since the sharpness of the threshold  
245 varies, it may be best to define the storm rainfall size at which there is a 50% of rainfall runs  
246 off as a theoretical ~~operational~~ threshold.

247  
248 Two valuable ways of generalising response at the hillslope scale are through the concepts of  
249 connectivity (McGuire & McDonnell, 2010; Bracken et al, 2015) and residence time (e.g.  
250 Tetzlaff et al, 2010). At its simplest, connectivity queries the presence or absence of a

251 through connection between two points. However, it has proved more fruitful for describing  
252 the totality of connections from points in an area to an outlet point, and is thereby  
253 linked to the runoff coefficient. Connectivity has been widely applied in ecology (McCrae et  
254 al, 2008) applying an analogy with electrical conductivity, but the one-way nature of water  
255 flow downhill makes this less applicable in hydrology. Instead the application of percolation  
256 theory or the concept of a breakthrough volume to establish connections have proved more  
257 applicable, and continue to be developed (Larsen et al, 2012; Janzen & McDonnell, 2015).  
258 Residence time is, in a way, the inverse of connectivity, long residence times being  
259 associated with poor connectivity and vice versa for a given reservoir size. The great value of  
260 residence time is that its mean value and distribution can be quantified using tracer methods.  
261 Perhaps these methods may provide the basis for a better understanding of how water  
262 interacts with the critical zone, by focussing on the hillslope rather than the soil profile scale.

263  
264 Within even a relatively simple soil profile, there are a number of inter-connected reservoirs  
265 of water (Figure 34); Rainwater infiltrates into the soil matrix and in films along the walls of  
266 macropores, filling them completely only when the soil is saturated. Further infiltration into  
267 the soil matrix takes place along macropore walls. Mainly during storms, some water is able  
268 to reach a perched or regional saturated level where it provides most saturated lateral  
269 subsurface flow. Water in the matrix provides the main reservoir for extraction by plant roots  
270 as transpiration, newly infiltrated water mixing with water that has already resided in the  
271 matrix for many months. Saturated subsurface flow also comes from a reservoir in which old  
272 and new water are mixed together (McDonnell, 2014; Kirchner et al, 2000). During a storm,  
273 therefore, much of the ‘new’ rainwater is replacing local storages, while much of the slope  
274 base outflow consists of older water that is being pushed out. In soil profiles and soil catenas  
275 more complex than the cartoon of figure 34, and where flood plain deposits abut hillslope  
276 catenas, the possible pathways and range of residence times are further increased (Tetzlaff et  
277 al, 2010; McGuire & McDonnell, 2010).

278  
279 Some storm precipitation is not involved in this fill and spill process. Until break-through  
280 occurs, all of the rainfall; and after break-through a small fraction, percolates downwards  
281 commonly reaching a level of saturation. Where and when precipitation is of the same order  
282 as, or exceeds potential evapotranspiration, this downward percolation contributes to lateral  
283 subsurface flow that brings the saturation level progressively closer to the surface in response  
284 to flow rates that respond to hillslope plan and profile form: in less humid areas this  
285 percolation only occurs in the largest storms, and most water is lost to evapotranspiration.  
286 Subsurface flow between and during storms, if it occurs, establishes a dynamically varying  
287 saturated area, usually along slope-base concavities and plan-convergent stream heads.  
288 Rainfall falling on these saturated areas cannot enter the soil, but is immediately diverted as  
289 saturation excess overland flow. The fill and spill level and the saturated subsurface flow  
290 level are discussed here as being physically separate, but may be vertically adjacent, distinct  
291 or combined and/or in multiple layers. In many cases one or other of these mechanisms  
292 dominates the hydrological response of a hillslope or headwater area (Beven, 2000; Tarboton,  
293 2003). Both fill and spill mechanisms and saturated contributing area mechanisms share a  
294 very strong non-linearity in response to storm size, corresponding to the increasing  
295 connectivity of flow. At extremes which are rarely achieved, there is 100% connectivity, but  
296 most observations reflect the region of increasing partial connection (e.g. Bracken et al,  
297 2013), although the mechanisms of establishing connected flow differ, with persistent  
298 subsurface connection for saturation excess and episodic connection in storms for fill and  
299 spill dominated systems greatly.

300



301 For infiltration excess overland flow and other fill and spill regimes, connection is typically  
302 established dynamically during the course of each individual storm, and decays rapidly  
303 afterwards. For saturation excess regimes, initial connections are established by subsurface  
304 flow that persists between storms in areas where precipitation exceeds potential  
305 evapotranspiration. The saturated area continues to expand during a storm, and connectivity  
306 is only slowly lost, often on a seasonal time scale (Reaney et al, 2014). Over a period, an area  
307 may experience fill and spill runoff when storm rainfall exceeds some threshold; and may, at  
308 other times, experience saturation excess runoff when net rainfall over a period exceeds  
309 another threshold. The fill and spill threshold depends on the structure of vertical storage  
310 within the soil, whereas the saturation excess threshold depends on topographic wetness  
311 index and near-surface lateral permeability (Sivaplan et al, 1987, Kirkby et al, 2008). Clearly  
312 semi-arid areas, with little net rainfall, rarely experience saturation excess runoff, but both  
313 mechanisms can co-exist in an area, often with seasonal switching between the two modes  
314 (Kirkby et al, 2011)

315

### 316 **3. Water as a transporting medium in the critical zone**

317 As parent material weathers, breaks down **physically into smaller fragments** and is eventually  
318 removed by erosion at the surface, it passes through the critical zone from bottom to top.  
319 Figure 4-5 sketches the path of grains from the parent material for a steady state in which the  
320 critical zone depth remains constant, surface erosion balancing advance of the weathering  
321 front. Initially a grain is subjected mainly to chemical weathering, so that it approaches the  
322 surface vertically, relative to the downward advancing weathering front. As grains get closer  
323 to the surface, they become increasingly influenced by diffusive movements in the soil.  
324 These all gradually move material down-slope, at a rate that decreases with depth.  
325 Eventually erosion will expose grains at the surface and remove them (Anderson et al, 2002).  
326 There is a lateral flux of eroded sediment and weathering products in solution at every point  
327 down the length of the hillslope, and, perhaps after intermediate deposition, this material is  
328 finally exported at its base, normally to a channel.

329

330 Water plays an essential part in these processes, generally percolating less and less with depth  
331 where it interacts with rock minerals to release solutes and advance the weathering front  
332 (Anderson et al, 2007; Kirkby, 2015). The water is then partly diverted laterally, and partly  
333 returned to the surface as evapotranspiration. In semi-arid climates, where potential  
334 evapotranspiration exceeds precipitation, there is little lateral movement, and many solutes  
335 are re-deposited beneath the surface. In more humid climates, lateral flow carries solutes  
336 away, and weathering produces a much greater loss of rock substance.

337

338 Within the soil, slow diffusive movement is commonly driven by freeze-thaw, wetting-drying  
339 and/or bioturbation, and all of these respond positively to the presence of soil water. Where  
340 the slope configuration is suitable, larger and more rapid mass movements can also move  
341 critical zone materials downhill, usually under conditions close to saturation. At the surface,  
342 raindrop impact and overland flow drive soil erosion, which is most effective where the  
343 surface is not protected by vegetation or stone cover. In all of these ways, the action of water  
344 is strongly instrumental in shaping the path followed by grains as they migrate through the  
345 critical zone (figure 4-5) and progressively reduce in grain size.

346

347 Weathering processes progressively convert strong rock minerals, that have generally been  
348 synthesised under high temperatures and pressures in an anoxic environment, to weathering  
349 products that are closer to equilibrium with surface conditions and oxygen levels. In this  
350 process most minerals lose strength, eventually converted to granular sand or silt and clay

351 minerals. This loss of strength and reduction in grain size facilitates lateral movement of  
352 weathered material close to the soil surface. The balance between chemical(C) and  
353 mechanical (M) denudation rates determines the degree of weathering of surface soils. The  
354 depletion ratio (Riebe et al, 2003), defined as  $C/(C+M)$  is a measure of the degree of  
355 weathering in the soil, and generally increases in humid climates (with high C) and decreases  
356 where slope gradients are high (with high M). ~~Water circulation is progressively reduced with  
357 depth in the soil.~~ Low rates of mechanical denudation reduce stripping of the soil, which then  
358 accumulates to greater depth and, in turn, reduces chemical denudation, so that depletion  
359 ratios, in any given rock/climate environment, tend towards a stable end-point value.

360  
361 Water also plays an important role in the carbon and nitrogen cycles that are central to  
362 biological activity. ~~Carbon is fixed in photosynthesis from  $CO_2$  in the atmosphere to  
363 synthesise the carbohydrates that form the bulk of above and below ground plant tissue. It is  
364 released as surface litter above ground, and by root decay within the upper parts of the critical  
365 zone, where it accumulates as soil organic matter that gradually decomposes to release  $CO_2$   
366 first back into the soil air and eventually to the atmosphere. Saturation with water, by  
367 reducing oxygen in the soil, greatly slows decomposition, changing the environment and  
368 effectiveness of the soil microorganisms responsible. Except in the most arid conditions, the  
369 rate of oxic decomposition increases with temperature. Soil organic matter is very effective  
370 in readily storing and releasing soil water, thereby acting as one critical reservoir for plant  
371 water uptake. Soil organic matter also provides nutrition for worms, termites and other  
372 macro invertebrates in the soil that physically mix and aerate the soil, accelerating both  
373 decomposition and water exchange.~~

374  
375 ~~Nitrogen is fixed from the atmosphere, mainly by fungi, strongly enhancing the ability of  
376 plants to synthesise the proteins which are essential for healthy growth. These macroscopic  
377 and microscopic organisms rely on soil organic matter and the water in it for their own  
378 metabolism. The vegetation, carbon and nitrogen cycles therefore mutually reinforce each  
379 other, relying on water as a key medium for the uptake of nutrients. Some organic nitrogen is  
380 incorporated into soil organic matter, and some breaks down, mostly to nitrate which is  
381 highly soluble in water and so is readily lost in runoff.~~

382  
383 Much of the Nitrogen in circulation comes from the application of artificial fertiliser for  
384 agriculture, and in deposition around urban areas. Although essential for the increased yields  
385 it promotes, it is also one of many organic and inorganic pollutants that reach the soil through  
386 direct application and/or in wet and dry deposition (Keesstra et al, 2012). These pollutants or  
387 their metabolites play an increasing role in contaminating stream groundwater, with  
388 potentially adverse effects on soil organisms and human health (Davidson, 2009).

389  
390 Overland flow, however generated, is the key agent of soil erosion. Unprotected soil surfaces  
391 are impacted by raindrops that break up and detach surface aggregates, packing some down  
392 to crust and seal the surface, and ejecting some either into the air (rainsplash) or, where water  
393 is already flowing downslope, into the flow (rainflow). Once flow becomes sufficiently  
394 strong, due to topographic convergence and/or at high rainfall intensities, the tractive stress  
395 exerted directly by the flowing water becomes sufficient to erode the surface and detach  
396 material (rillwash). When this happens, the flow begins to incise channels into the surface,  
397 thereby increasing the convergence of flow lines in a positive feedback that leads to rilling or  
398 gullying. All of these processes are highly size-selective, transporting the finest material  
399 farthest from its detachment point, and rates of movement increase with slope gradient  
400 (Knapen et al, 2007).



401  
402 Surfaces may be protected either by vegetation or by stone cover. The crown cover of  
403 vegetation breaks the impact of falling raindrops, so that they then strike the ground with low  
404 momentum and detach little material (except under high-crowned trees). Stones protect the  
405 surface directly, and each stone tends to shield a rim of soil in its immediate shadow, so that  
406 it does not become crusted (Poesen et al, 1994; Cerda, 2001). Crusting, particularly in silt-  
407 rich soils, is very effective in reducing infiltration and therefore increasing overland flow and,  
408 indirectly, erosion. Where the soil is stony, initial erosion tends to winnow out the fine  
409 material until the stones, that are less easily carried away, are left behind to armour and  
410 partially protect the surface from further erosion. Deep gullying is therefore strongly  
411 associated with deep soils that are deficient in stones, either through the action of weathering  
412 or as a property of the parent material: thick loess deposits provide an extreme example.

413  
414 Agricultural fields, at times of year when the surface is almost bare, are generally vulnerable  
415 to greater erosion than areas of semi-natural vegetation, particularly so when this period is  
416 also one with a high risk of intense rainstorms. During a severe storm, rills generally form  
417 with a more or less regular spacing. At the same time as their bed is being incised by the  
418 concentrated flow, material is also being delivered to them by rainsplash and rainflow from  
419 the intervening areas, so that their downward incision may be self limiting, often cutting  
420 down only to a hardened plough-pan level.

421  
422 On all but the steepest slopes, slow mass movements, soil erosion by water and chemical  
423 denudation are the dominant processes through which hillslopes evolve over time. Under  
424 diffusive processes such as soil creep, rainsplash and tillage erosion, hillslope profiles  
425 gradually evolve towards a mainly convex form, with a narrower concavity towards the base,  
426 as has long been observed (Gilbert, 1877). In steeplands however, rapid mass movements  
427 assume the dominant role, and tend to produce almost rectilinear slopes once cliffs have been  
428 eliminated. The much higher rates of sediment transport create a critical zone that generally  
429 remains thinner, and with lower chemical depletion ratios than on lower-gradient slopes, even  
430 though the shallow soil depth promotes a relatively high rate of chemical denudation  
431 (Embersson et al, 2015).

432  
433 Sediment transport, also shapes the three-dimensional landscape geometry, through the  
434 interplay of diffusive and advective sediment transport processes. Where advective sediment  
435 transport by water is able to evacuate sediment faster than it can be replaced by diffusive  
436 processes or mass movement, then channels become progressively incised, defining the  
437 drainage density of the landscape, and so the average length of hillslope profiles. This is a  
438 dynamic process in which major storms are responsible for headward stream extension, and  
439 fresh headcuts are partially infilled between major storms, so that the instantaneous stream  
440 head position fluctuates, reflecting recent storm history. Drainage density tends to be higher  
441 in more arid climates, reflecting the dominance of surface flow processes where vegetation is  
442 sparse. Density also tends to increase with valley gradient, because advective transport  
443 generally increases more than diffusive transport as gradient increases (Montgomery &  
444 Dietrich, 1992).

445  
446 The interplay of hillslope and channel processes responds not only to climatic variability but  
447 also to land use changes that modify sediment supply, most strikingly following changes in  
448 land use. Where land use change exposes more bare soil, as in deforestation and adoption of  
449 arable farming, runoff and sediment load tends to increase. Channel runoff is generally less

450 strongly affected by local changes, so that the increased sediment delivered from side slopes  
451 is redeposited along channelways because their transporting capacity is not proportionally  
452 increased (Rommens et al, 2005). Contrariwise, afforestation can lead to stream incision  
453 (Keesstra, 2007, Sanjuan et al, 2010).

454  
455 These considerations show that water plays a crucial role in almost all processes acting within  
456 the critical zone, and across the full range of landscape scales (Brantley et al, 2007; Anderson  
457 et al, 2015). Although other factors, such as lithology and tectonics, also play a very  
458 important role, climate, principally acting through the availability and distribution of water,  
459 has a dominant influence on the structure and composition of the soil, on the rates and styles  
460 of mechanical and chemical denudation, and on the profile form, plan shape and length of  
461 hillslope profiles. Many of the processes involved in shaping three-dimensional hillslope  
462 form are now being incorporated into successful landscape evolution models (Tucker et al,  
463 2001; Egholm et al, 2013) including the effects of non-linear diffusion (Roehring et al,2001).  
464 However, the incorporation of chemical solution in these models perhaps remains their least  
465 satisfactory component (Brantley et al, 2007).

#### 466 **Water for plant growth**

467  
468 Roots grow actively to seek pore water which they require to maintain their turgor against  
469 strong capillary tension and to permit photosynthesis. Except where a saturated zone in  
470 within reach of their root system, the water that plants use appears to come mainly from the  
471 matrix within soil peds, and is substantially separate from the water in cracks and macropores  
472 between aggregates that is the main contributor to stream flow (McDonnell 2014). When  
473 water flows through macropores, it also infiltrates into the peds beside each macropore,  
474 recharging the soil matrix which then provides a longer lasting store of water to supply the  
475 plants (Germann and Beven, 1985). Water also supports soil microflora, especially fungi,  
476 bacteria and viruses; and fauna from termites and earthworms to nematodes and protozoa that  
477 graze, mainly on bacteria and living plant material or their organic matter residues. Bacteria  
478 are important in catalysing weathering processes and, with some fungi (mycorrhiza), support  
479 plant growth by fixing atmospheric nitrogen. The various soil organisms are essential to a  
480 healthy soil, and may typically contribute up to 405% of the total organic soil biomass.

481  
482 It has been argued (Schymanski et al, 2008) that the vegetation cover develops in such a way  
483 as to maximise its productivity, and such a principle of optimality may be a way to simplify  
484 the complex web of interactions linking vegetation and soil organisms to water use. Most  
485 existing models, however, use a more physically based set of constraints to model vegetation  
486 and how it may respond to global climate change (e.g. Scheiter et al, 2013).

487  
488 Matrix water is most abundant frequently available near the soil surface, since macropores  
489 are most frequent there, and are commonly active with every rainfall event. Roots require  
490 water and oxygen and partly-distributions tend to mirror this distribution, often with a more  
491 or less exponential decay in density with depth. Some plants also develop deep tap roots that  
492 can reach down to a water table at 10 m or greater depths, a strategy favoured by semi-arid  
493 phreatophytes that exploit local water tables below ephemeral streams.

494  
495 Although wWater is probably the most important agentnot directly responsible for the  
496 structure and processes within the root zone;- its presence and distribution, acting through the  
497 vegetation and soil organisms, enables-enabling the processes of decomposition and  
498 bioturbation that dominate these surface layers of the critical zone, and these processes  
499 profoundly modifying the soil structure and hydrology.

500  
501 Plant roots and mesofauna (e.g. earthworms and termites) physically break up the soil,  
502 allowing the penetration of air and water. Larger burrowing animals, falling trees and freeze-  
503 thaw or wetting-drying cycles can also play a part in breaking up and mixing the near-surface  
504 soil. The cumulative action of all these processes can be considered as a diffusive mixing,  
505 with a net upward drift of soil material towards the free surface, which is counterbalanced by  
506 settling under gravity, significantly assisted by the downward percolation of water (Gabet, et  
507 al, 2003). Over a few decades, the balance between these processes leads to an equilibrium  
508 bulk density profile, in which porosity declines with depth. This bioturbation mixes and  
509 homogenizes the upper layers of mineral soil, since it occurs much more rapidly than  
510 chemical weathering, and may readily be visually distinguished from weathered saprolite, in  
511 which original bedrock morphology is preserved in the weathered material.

512  
513 Organic matter is released from plants, partly as leaf (and stem) fall to accumulate on the  
514 surface and partly as in-situ root decay. Over decades, this material takes part in the vertical  
515 mixing and is also decomposed, gradually releasing CO<sub>2</sub> into the soil (Attal et al.2015;  
516 Johnson et al, 2014; Herold et al, 2014). Since the processes of mixing and decomposition  
517 occur over similar time-spans of decades to centuries, the soil organic matter also develops a  
518 vertical distribution within the soil, generally with a smaller scale depth (10s of centimetres)  
519 of exponential decay than for bulk density. Plants also modify the chemical environment of  
520 the soil, synthesising organic acids that influence water movement and soil pH.

521  
522 These mixing processes, by modifying the near-surface soil, tend to increase the rate at which  
523 water is able to infiltrate, creating a positive feedback in which greater biological activity  
524 increases the availability of water in the soil, which in turn encourages biological activity.  
525 Eventually, soils are able to absorb the available precipitation so that, over a time span of  
526 decades to centuries, there is a feedback tendency for soil structure, and to some extent  
527 topography, increasingly to reflect the natural vegetation and to reduce overland flow runoff.

#### 528 529 **4. Water as an agricultural and food resource**

530 By far the greatest consumptive use of water by mankind is for agriculture. An average of  
531 approximately 3,800 litres a day is needed to support each individual (Hoekstra & Mekonnen,  
532 2012), 92% of which grows their food. Other major requirements are for domestic use  
533 (3.8%) and for clothing and other industrial products (4.7%). These requirements differ in  
534 kind, in that domestic water has to be delivered to the individual, whereas for other uses the  
535 water can be more economically provided by transporting the food or clothing. However,  
536 most countries are also concerned with food security, so that there is some perceived pressure  
537 towards being at least partially self-supporting for food production.

538  
539 Historically, the development of large scale agriculture has been in semi-arid regions of the  
540 Middle East and Meso-America, commonly using irrigation water canalised from rivers  
541 (Mazoyer & Roudart, 2006). Semi-arid areas have the advantages of providing ample solar  
542 energy for photosynthesis, together with relative ease of weed removal. However, irrigation  
543 has, historically, commonly led to salinization of the soil, sometimes irreversible, depending  
544 on the quality of the irrigation water and whether sufficient irrigation water has been applied  
545 to leach excess salts.- Clearance of land in warm humid regions, although providing ample  
546 water and solar energy, is hampered by the re-establishment of native weed species and rapid  
547 leaching-depletion of topsoil nutrients. Long fallow periods (shifting agriculture) were  
548 therefore required until modern machinery and fertilisers could be applied. Increasing  
549 population pressure may also place pressure on land resources, forcing undesirable reductions

550 in the fallow rotation period. In all areas, seasonal exposure of the bare land surface prior to  
551 planting and after harvest, expose the land to increased soil erosion, particularly when rainfall  
552 is intense at these critical times of year. In the great majority of cases, arable farming  
553 increases the natural rates of soil erosion by water, increasing losses by at least an order of  
554 magnitude (Montgomery, 2007) and progressively degrading the land. Water erosion takes  
555 some steeper, thin-soil areas out of production and, more widely, removes the most nutritious  
556 topsoil and organic material. Cultivation, by exposing the soil surface and allowing it to dry  
557 out, can also increase wind erosion in semi-arid areas (e.g. Houyou et al, 2014). In addition,  
558 conventional ploughing, whether on the contour or downslope, moves material downslope  
559 and generally exposes soil organic matter to more rapid decomposition, reducing the long-  
560 term water holding capacity of the soil. However, because significant deterioration of the soil  
561 takes many decades and restoration is also slow, farmers may have little short-term incentive  
562 to improve conservation practices.

563  
564 Some of the negative effects of agriculture can be mitigated by appropriate management (e.g.  
565 Keesstra et al, 2016), but these often require initial and ongoing investment that is not  
566 available to all farmers. Some soil conservation measures such as inter-cropping can be  
567 applied at low cost but the majority, including terracing, contour ploughing, residue  
568 management, water harvesting, and reduced tillage, require investment and/or some sacrifice  
569 of cultivable land area. Management systems that retain a vegetation cover reduce the loss of  
570 sediment (Abrahams et al, 1994; Zhao et al, 2016) and organic matter (Gao et al, 2016), even  
571 where runoff is not reduced.

572  
573  
574  
575 As well as on-site management of water resources, there is a global shortage of renewable  
576 water resource in the face of increasing populations. There are a number of technical  
577 solutions to these problems, for example breeding crops that require less water, irrigating  
578 crops as efficiently as possible without incurring the risk of salinization and water harvesting.  
579 Others, for example large scale desalinisation of sea water, carry significant costs that cannot  
580 readily be accepted by increasing the cost of food to consumers.

581  
582 ~~The scale of the water shortage can be seen through global patterns of malnutrition. Figure 5,~~  
583 ~~compiled by FAO (FAO et al, 2015) shows the proportions of national populations with~~  
584 ~~inadequate nutrition. While issues of governance and local conflicts play a significant part in~~  
585 ~~this distribution, there is a strong underlying message about agricultural productivity and~~  
586 ~~availability of water, in that many of these areas are affected by shortage of renewable water~~  
587 ~~resources.~~

588  
589 The broader implications, for global water needs and for food security, are analysed further in  
590 figures ~~6-8-6-8~~ on a country by country basis, using data drawn from FAO reports (2000,  
591 2016). In figure ~~66~~, the population that can be supported by renewable water and potential  
592 arable land resources is calculated, using two simplified scenarios. In the first, rain-fed cereal  
593 cultivation is assumed, utilising the available average annual water supply from rainfall. For  
594 efficient agriculture with good agronomic practice and fertiliser application, the grain yield  
595 Y in kg.Ha<sup>-1</sup> is calculated as

$$596 \quad Y = 16.7 (E - 150),$$

597 Where E is the annual depth of water in millimetres available for plant transpiration, which is  
598 assumed equal to precipitation for dry climates (based on Sadras et al, 2011). An upper limit  
599 of 8,400 kg.Ha<sup>-1</sup> is assumed, corresponding to a consumptive use of 600mm in optimal

Formatted: Superscript

Formatted: Indent: First line: 1.27 cm

600 conditions. However yields in the Western Sahel, and elsewhere where soils are poor and  
601 fertiliser not widely available are approximately 40% of the above estimate. In figure 6a,  
602 estimates of sustainable population are plotted against actual country population. The blue  
603 line and left hand vertical scale refer to efficient agriculture with adequate fertiliser inputs: the  
604 red line and right hand scale to low efficiency agriculture. In each case the lines indicate  
605 countries with or without adequate resources for self-sufficient rain-fed agriculture. It can be  
606 seen that there are a few counties without adequate rainfall, even with efficient agriculture,  
607 and a number that may fail without efficient farming practices. In addition, 31% of the  
608 countries, for which there is data, have less than 150 mm annual rainfall and therefore do not,  
609 on average, have enough water to support any rain-fed farming.

610  
611 In a second scenario, efficient water harvesting, potentially gathering water from the entire  
612 area, is used to concentrate water on as much as possible of the potentially arable land, to  
613 provide 600mm of water and optimum yields on the farmed area. Figure 6b shows, with a  
614 similar key, that many countries are still short of water, and the extent to which efficient  
615 farming alleviates this. Figure 6b appears to show many more countries with a water deficit  
616 than figure 6a, but this is because all countries have at least some theoretical water harvesting  
617 potential. Although these simple analyses make

618  
619 assuming that approximately 600mm of water per year is required to grow a crop, so that  
620 water is the limiting factor in some areas, and available land in others. Although this makes  
621 the optimistic assumption that water is freely transferrable within a country, it can be seen  
622 that there remains a substantial shortfall in many countries, and that in many areas this a  
623 shortfall is due to lack of sufficient water resources, including for the two largest populations  
624 in India and China that is made more severe where yields are low due to a lack of fertiliser  
625 and good farming practice. Some continuing increase in world population, together with  
626 further deterioration of soil resources due to erosion and salinization, therefore presents a  
627 major challenge for the future.

628  
629 Figure 7-7 shows the actual and potential arable land in each country and the average  
630 renewable water in each. The horizontal line is set at 600mm, which is the approximate  
631 amount of water required to grow an optimal cereal crop. It can be seen that many countries  
632 have not sufficient water to make full use of their presently utilised arable land resources, and  
633 that water limitations are a major factor in preventing cultivation of additional potential  
634 arable land. Figure 8-8 shows the renewable water resources per capita for each country,  
635 plotted against the population. The upper horizontal line shows the approximate amount of  
636 water required to grow food for the population (ca 1200 m<sup>3</sup> per capita per year), and the  
637 lower line the amount needed for domestic use (ca 60 m<sup>3</sup> per year). It can be seen that there  
638 are many countries that cannot feed themselves, and a smaller number that lack sufficient  
639 renewable water to supply domestic needs. Although food needs can be and currently are  
640 being partially met by international trade, with implicit water transfers within the food, lack  
641 of food security remains a source of potential conflict.

642  
643 One renewable and low cost means of increasing available water is through water harvesting.  
644 Where rainfall is almost adequate for rain-fed farming, conservation measures may be all that  
645 is needed to ensure that storm runoff is retained on-site, in mulch layers, in trenches or behind  
646 bunds. As water scarcity increases, an area to be cultivated can be supplied with runoff from  
647 a collecting area above and around it, which provides water to the cultivated patch. The  
648 required ratio of cultivated area to collecting area can be estimated as the ratio of actual to  
649 potential evapotranspiration in a given region. Analysis of the climate thus gives some idea

650 of where different styles of water harvesting can be applied most effectively. Figure 9-9  
651 shows, for Africa, the ratio of actual to potential evapotranspiration for the most suitable 5-  
652 month growing season, and for the worst 25% of annual conditions. Water harvesting can  
653 benefit crop yields when this ratio lies between about 0.2, where ephemeral stream floods can  
654 be diverted into fields up to about 1.5 to maximise crop reliability in areas with high inter-  
655 annual variability. The ratios of collecting area to irrigated area are the reciprocals of these  
656 values, and are generally somewhat larger due to the inefficiencies of collection and  
657 redistribution. Where the collecting area is large, runoff collection can be made more  
658 efficient by removing stones from the surface to encourage crusting of the soil, and by  
659 channelling runoff into discrete runnels to further reduce infiltration losses.

660  
661 Where the collecting: cropping area ratio is low (<3), an individual group of plants can be  
662 supplied by an immediately adjacent patch of bare soil. This gives a pattern of pits where  
663 seeds are planted, each surrounded by a small area that drains towards it (zai). At larger  
664 scales, a small planted field of, say 10x10 m, may be supplied with water collected from a  
665 small upslope min-catchment (jessour), with perhaps a 20:1 ratio of collecting area to irrigated  
666 area. At the coarsest scale, ~~these~~ these water harvesting practices (Critchley et al, 1991)  
667 ~~practices~~ merge into regional irrigation systems. Increases in the ratio of collecting area to  
668 cultivated area lead to increased yields, but this may be offset by the sacrifice of potential  
669 yield from the uncropped area where this is also suitable for arable farming. Part of the net  
670 advantage is therefore obtained through greater labour efficiency in farming a smaller area,  
671 and the reduced likelihood of crop failure. Figure ~~4-10~~ shows the modelled frequency  
672 distribution of estimated yields over a run of years, for Mekele (northern Ethiopia), with  
673 different ratios of collecting to cropping area (CAR). It can be seen that although most years  
674 provide some harvest, the median yield and its reliability are greatly enhanced by water  
675 harvesting (Fleskens et al, 2016). Reliability can be further increased by installing ponds  
676 that not only collect but also store water, often allowing irrigation in dry spells, but subject to  
677 evaporative loss.

678  
679 It is clear that water is a critical resource for agriculture, and will become more so in the  
680 future (Falkenberg et al, 2009), particularly because global warming is thought to increase  
681 aridity in many water stressed areas (e.g. Gao and Giorgi, 2008 for the Mediterranean), and  
682 because of the interactions with energy production (Pimentel et al, 2004). Figure ~~4-12~~  
683 sketches some of the interactions that need to be managed in order to maintain affordable  
684 food production for a still growing world population. Crop production requires both water  
685 and energy, mainly used for the manufacture of nitrogen fertiliser, but also for transportation  
686 on the farm and to the market. Widespread use of fertiliser has quadrupled yields since 1900,  
687 reducing the dependence of land as a critical resource, but without reducing the need for  
688 additional water to support the increased crop yields, so that water has become the most  
689 critical resource for further expansion of food production. Nitrogen fertiliser production uses  
690 3-5 % of world natural gas as a source of hydrogen, and only a fraction of the nitrogen is used  
691 by crops, so that nitrogen is a major source of pollution both directly in runoff, re-cycled  
692 through animal manure, and as a greenhouse gas. Nitrogen in runoff contaminates  
693 groundwater and is responsible for eutrophication of lakes and coastal waters.

694  
695 Although water can be desalinated, the cost of irrigation water produced from seawater its  
696 cost is very high in relation to other costs of food production. Typical developed world farm-  
697 gate current cereal costs of about 200 USD per tonne (Zimmer, 2012) would be increased by  
698 about 1000 USD per tonne for the desalinated water needed to grow the cereal (ca 1 USD per  
699 cubic metre). These costs may be becoming acceptable for domestic water supply and for



700 some high value crops, but cannot, at present, be accepted for staple foods or animal  
701 husbandry. Although desalination might be supported by renewable energy, for example to  
702 irrigate the Sahara, it also generates disposal problems for the salt removed, and so is not  
703 environmentally neutral.

704  
705 ~~Other pressures on water and land resources are also exacerbated as demand for food~~  
706 ~~increases, even more so if more meat is included in typical diets. Population growth will add~~  
707 ~~to existing pressure on cities, as agriculture is made more intensive. Urban and highway~~  
708 ~~development has already covered 2.3% of the European land area, much of it at the expense~~  
709 ~~of prime arable land. Agriculture has always been a risk factor, significantly increasing soil~~  
710 ~~erosion (Montgomery, 2007) above background rates. As more land is taken into cultivation,~~  
711 ~~it generally becomes more marginal, and so further increases the impact of erosion.~~  
712 ~~Irrigation, particularly where water is scarce, increases the loss of land to salinization.~~  
713 ~~Sealing, erosion and salinization all lead to some irreversible loss of cultivable land.~~

## 714 715 **5. Conclusion**

716 Water is everywhere. Life and mankind would not exist without it. As population continues  
717 to grow, fresh water is becoming an increasingly scarce resource. To make the best use of  
718 fresh water, most critically for food production, it is vital to share it wisely. One key aspect  
719 of this is to progressively improve our knowledge of how water interacts with the critical  
720 zone at every time and space scale, and to better recognise, and gradually stretch the limits of  
721 what is possible. Water and soil present challenges at every scale, from the grain to the  
722 globe, and it is a matter of urgency to engage with these issues as best we can, both as  
723 practical problems requiring urgent solution and to enhance scientific understanding.

## 724 725 726 727 **References**

- 728  
729 Abrahams, A.D., Parsons, A.J. & Wainwright, J., 1994. Resitstance to overland flow on  
730 semiarid grassland and shrubland hillslopes. *J. Hydrology*, 156, 431-446. DOI:  
731 10.1016/0022-1694(94)90088-4
- 732 Ali, G., C.J. Oswald, C. Spence, E.L.H. Cammeraat, K.J. McGuire, T. Meixner & S.M.  
733 Reaney, 2013. Towards a unified threshold-based hydrological theory: necessary  
734 components and recurring challenges. *Hydrological Processes* 27, 313-318. DOI:  
735 10.1002/hyp.9560
- 736 Anderson, R.S. & Anderson, S.P.,2010. *Geomorphology: the mechanics and chemistry of*  
737 *landscapes*. Cambridge University Press. 651pp. isbn: 978052151978.
- 738 Anderson, S.P., Anderson, R.S. & GE Tucker, G.E.,2012. Landscape scale linkages in critical  
739 zone evolution. *Comptes Rendus Geoscience* 344 (11), 586-596. DOI:  
740 10.1016/j.crte.2012.10.008
- 741 Anderson, S.P., RC Bales, R.C., & CJ Duffy, C.J., 2008.Critical Zone Observatories:  
742 Building a network to advance interdisciplinary study of Earth surface processes.  
743 *Mineralogical Magazine* 72 (1), 7-10. DOI: 10.1180/minmag.2008.072.1.
- 744 Anderson, S.P., von Blanckenburg, F., White,A.F., 2007. Physical and chemical controls on  
745 the critical zone. *Elements* 3 (5), 315-319. DOI: 10.2113/gselements.3.5.315
- 746 Anderson,S.P., Dietrich,W.E., Brimhall, G.H., 2002 Weathering profiles, mass-balance  
747 analysis, and rates of solute loss: Linkages between weathering and erosion in a small,  
748 steep catchment *Geological Society of America Bulletin* 114 (9), 1143-1158.

Formatted: Don't adjust space between Latin and Asian text, Don't adjust space between Asian text and numbers

Formatted: Font: (Default) Times New Roman, 12 pt

Formatted: Font: (Default) Times New Roman, 12 pt

Formatted: Font: (Default) Times New Roman, 12 pt

749 Anderson, S.P., Foster, M.A., Anderson, S.W., Dühnforth, M., Anderson, R.S., 2015. Putting  
750 weathering into a landscape context: Variations in exhumation rates across the Colorado  
751 Front Range. EGU General Assembly Conference Abstracts 17, 7992

752 [Attal, M., S.M. Mudd., MD. Hurst., B. Weinman, K. Yoo., & M. Naylor, 2015. Impact of](#)  
753 [change in erosion rate and landscape steepness on hillslope and fluvial sediments grain](#)  
754 [size in the Feather River basin \(Sierra Nevada, California\) Earth Surface Dynamics 3,](#)  
755 [201-222.](#)

756 Banwart, S., Manoj Menon, M., Bernasconi, S.M., Bloem, J., Blum, W.E.H., Maia de  
757 Souza, D., Davidsdotir, B., Duffy, C., Lair, G.J., Kram, P., Lamacova, A., Lundin, L.,  
758 Nikolaidis, N.P., Novak, M., Panagos, P., Vala Ragnarsdottir, K., Robinson, D.,  
759 Rousseva, S., de Ruyter, P., van Gaans, P., Weng, L., White, T., Zhang, B., 2012. Soil  
760 processes and functions across an international network of Critical Zone Observatories:  
761 Introduction to experimental methods and initial results. *Comptes Rendus - Geoscience*  
762 344 (11-12). 758-772. DOI: 10.1016/j.crte.2012.10.007

763 Bardgett, R., Anderson, J., Behan-Pelletier, V., Brussaard, L., Coleman, D., Ettema, C.,  
764 Moldenke, A., Schimel, J., and Wall, D., 2001. The influence of soil biodiversity on  
765 hydrological pathways and the transfer of materials between terrestrial and aquatic  
766 ecosystems, *Ecosystems*, 4, 421-429. DOI: 10.1007/s10021-001-0020-5

767 [Barthold, F.K. & Woods, R.A. 2015. 'Stormflow generation: A meta-analysis of field evidence from](#)  
768 [small, forested catchments' Water Resources Research, 51, 3730-3753.,](#)  
769 [10.1002/2014WR016221](#)

770 Beven, K. J., 2000. *Rainfall Runoff Modelling: The Primer*, John Wiley, Chichester. ISBN  
771 978-0-470-71459-1

772 Beven, K. & Germann, P., 1982. Macropores and water flow in soils. *Water Resources*  
773 *Research*, 18(5), 1311-1325. DOI: 10.1029/WR018i005p01311

774 Beven, K. & Germann, P., 2013. Macropores and water flow in soils revisited, *Water*  
775 *Resources Research* 49 (6), 30171-3092. DOI: 10.1002/wrcr.20156

776 Bracken, L.J. & Croke, J., 2007. The concept of hydrological connectivity and its  
777 contribution to understanding runoff-dominated geomorphic systems. *Hydrological*  
778 *Processes*. 21:1749-1763. DOI: 10.1002/hyp.6313

779 Bracken, L.J., Turnbull, L., Wainwright, J. & Bogaart, P., 2015. Sediment connectivity: a framework for  
780 understanding sediment transfer at multiple scales. *Earth Surface Processes and*  
781 *Landforms*. 40:177-188. DOI: 10.1002/esp.3635

782 Bracken, L.J., Wainwright, J., Ali, G.A., Tetzlaff, D., Smith, M.W., Reaney, S.M. & Roy,  
783 A.G., 2013. Concepts of hydrological connectivity: Research approaches, pathways and  
784 future agendas. *Earth-Science Reviews*. 119:17-34. DOI:  
785 10.1016/j.earscirev.2013.02.001

786 Brantley, S.L., Goldhaber, M.B., and Vala Ragnarsdottir, K., 2007. Crossing Disciplines and  
787 Scales to Understand the Critical Zone. *Elements*, 3, 307-314. DOI:  
788 10.2113/gselements.3.5.307

789 Brevik, E.C., Cerdà, A., Mataix-Solera, J., Pereg, L., Quinton, J.N., Six, J., and K. Van Oost,  
790 K., 2015. The interdisciplinary nature of SOIL. *SOIL*, 1, 117-129, 2015.  
791 doi:10.5194/soil-1-117-2015

792 Buckingham, E., 1907, *Studies on the movement of soil moisture*, Bureau of Soils, Bulletin  
793 38, Washington, D.C.: U.S. Department of Agriculture, Washington DC

794 Bullard, J.E. 2013. Contemporary glacial contributions to the dust cycle. *Earth Surface*  
795 *Processes and Landforms*. doi:10.1002/esp.3315. DOI: 10.1002/esp.3315

796 Cammeraat, E.L.H., Cerda, A & Imeson, A.C., 2010. Ecohydrological adaptation of soils  
797 following land abandonment in a semi-arid environment. *Ecohydrology* 3, 421-430.

- Formatted: Font: (Default) Times New Roman, 12 pt
- Formatted: Font: (Default) Times New Roman, 12 pt
- Formatted: Font: (Default) Times New Roman, 12 pt
- Formatted: Font: (Default) Times New Roman, 12 pt
- Formatted: Font: (Default) Times New Roman, 12 pt
- Formatted: Default Paragraph Font, Font: (Default) Times New Roman, 12 pt, Font color: Gray-80%
- Formatted: Font: (Default) Times New Roman, 12 pt
- Formatted: Default Paragraph Font, Font: (Default) Times New Roman, 12 pt, Font color: Gray-80%
- Formatted: Font: (Default) Times New Roman, 12 pt
- Formatted: Font: (Default) Times New Roman, 12 pt, Not Bold
- Formatted: Font: (Default) Times New Roman
- Formatted: Font: (Default) Times New Roman, Not
- Formatted: Font: (Default) Times New Roman
- Formatted: Font: (Default) Times New Roman

798 Cerda, A., 2001. Effects of rock fragment cover on soil infiltration, interrill runoff and erosion.  
799 European Journal of Soil Science 52, 59-68. DOI: 10.1002/eco.161

800 Critchley, W. K. Siegert & C. Chapman, 1991. Water Harvesting: a manual for the design and  
801 construction of water harvesting schemes for plant production. FAO, Rome

802 Darcy, H., 1856. Les Fontaines Publiques de la Ville de Dijon, Dalmont, Paris. 647pp

803 Davidson, E.A., 2009. The contribution of manure and fertilizer nitrogen to atmospheric  
804 nitrous oxide since 1860. Nature Geoscience 2, 659-662. doi 10:1038/NGE0608.

805 Dere, A., T. White, L. Jin, D. Harbor, M. Townsend, and S. L. Brantley, 2010. Shale weathering  
806 rates across a continental-scale climosequence. Geography and Geology Faculty  
807 Proceedings & Presentations. Paper 1.  
808 <http://digitalcommons.unomaha.edu/geoggeolfacproc/1>

809 Dunne, T. and L. B. Leopold, 1978, Water in Environmental Planning, W H Freeman and Co,  
810 San Francisco, 818 p. ISBN-10: 0716700794

811 Egholm, D.L., Knudsen, M.F. & Sandiford, M. 2013. Lifespan of mountain ranges scaled by  
812 feedbacks between landsliding and erosion by rivers. Nature 498, 475-480.  
813 doi:10.1038/nature12218

814 Emberson R., Hovius N., Galy A., Marc, O., 2016. Chemical weathering in active mountain belts  
815 controlled by stochastic bedrock landsliding. Nature Geoscience 9, 42-45. DOI:  
816 10.1038/NGEO2600

817 Falkenberg, M., Rockstrom, J. & Karlberg, L., 2009. Present and future water requirements  
818 for feeding humanity. Food Security 1, 59-69. DOI: 10.1007/s12571-008-0003-x

819 FAO, 1961. The Digitized Soil Map of the World. World Soil Resources Report 67., FAO Rome

820 FAO, IFAD and WFP, 2015. The State of Food Insecurity in the World 2015. Meeting the  
821 2015 international hunger targets: taking stock of uneven progress. Rome, FAO

822 FAO. 2016. AQUASTAT Main Database, Food and Agriculture Organization of the United  
823 Nations (FAO). Website accessed on [03/06/2016 14:44]

824 FAO, Land and Water Development Division, 2000. Land Resource Potential and Constraints  
825 at Regional and Country Levels, based on the work of A. J. Bot, F.O. Nachtergaele and  
826 A. Young, 114pp. FAO, Rome

827 Fleskens, L., Kirkby, M.J. & Irvine, B.J., 2016. The PESERA-DESMICE Modeling  
828 Framework for Spatial Assessment of the Physical Impact and Economic Viability of  
829 Land Degradation Mitigation Technologies. Frontiers in Environmental Science,  
830 <http://dx.doi.org/10.3389/fenvs.2016.00031>

831 Gabet, E.J., Reichman, O.J. & Seabloom, E.W., 2003. The Effects of Bioturbation on Soil  
832 Processes and Sediment Transport. Annual Review of Earth and Planetary Sciences.  
833 Vol. 31: 249-273 . DOI: 10.1146/annurev.earth.31.100901.141314

834 Gao, X. & Giorgi, F., 2008. Increased aridity in the Mediterranean region under greenhouse  
835 gas forcing estimated from high resolution simulations with a regional climate model.  
836 Global and Planetary Change 62, 195-209. DOI: 10.1016/j.gloplacha.2008.02.002

837 Gao, Y., Dang, X., Yu, Y., Li, Y., Liu, Y., and Wang, J., 2016: Effects of Tillage Methods on  
838 Soil Carbon and Wind Erosion, Land Degradation and Development, 27, 583-591,  
839 10.1002/ldr.2404. van Genuchten, M.Th., 1980. "A closed-form equation for predicting  
840 the hydraulic conductivity of unsaturated soils" (PDF). Soil Science Society of America  
841 Journal 44 (5): 892-898.

842 Germann, P.F. & Keven KJ, 1985. Kinematic Wave Approximation to Infiltration into Soils  
843 with Sorbing Macropores. Water Resources Research, 21, 990-996. DOI:  
844 10.1029/WR021i007p00990

845 Graham, C.B., Woods, R.A., McDonnell, J.J., 2010. Hillslope threshold response to rainfall  
846 (1): a field based forensic approach. J. Hydrology 393, 65-76. DOI:  
847 10.1016/j.jhydrol.2009.12.015

Formatted: Normal, Indent: Left: 0 cm, Hanging: 1 cm

Formatted: Font: 11 pt

Formatted: Font: 11 pt

Formatted: Font: 11 pt

Formatted: Default, Indent: Left: 0 cm, Hanging: 1.5 cm

Formatted: Font: 11 pt

Formatted: Font: 11 pt

Formatted: Font: 12 pt, Not Bold

848 Grayson, RB, Western, AW, Chiew, FHS and Bloschl, G. 1997 . Preferred states in spatial  
849 soil moisture patterns: Local and nonlocal controls. *Water Resources Research* ,  
850 33(12), 2897-2908. DOI: 10.1029/97WR02174

851 Green, W.H. and G. Ampt. 1911. Studies of soil physics, part I – the flow of air and water  
852 through soils. *J. Ag. Sci.* 4:1-24

853 Haber-Pohlmeier, S., Bechtold, M., Stapf, S. & Pohlmeier, A., 2009. Water Flow  
854 Monitored by Tracer Transport in Natural Porous Media Using Magnetic Resonance  
855 Imaging. *Vadose Zone Journal*, Vol. 9 No. 4, p. 835-845. DOI: 10.2136/vzj2009.0177

856 [Herold, N., I. Schöning, B. Michalzik & M. Schrumpf, 2014. Controls on soil carbon storage  
857 and turnover in German landscapes. \*Biogeochemistry\* 119,435–451.](#)

858 [Hewlett, J. D. and J. R. Hibbert, 1967, "Factors Affecting the Response of Small Watersheds  
859 to Precipitation in Humid Areas," in Forest Hydrology, Edited by W. E. Sopper and H.  
860 W. Lull, Pergamon Press, New York, p.275-291 reprinted 2009: Progress in Physical  
861 Geography doi: 10.1177/0309133309338118.](#)

862 Hillel, D. 1971. *Soil and Water*. Academic press. 288pp

863 Hoekstra, A.Y. & Mekonnen, M.M., 2012. The water footprint of humanity, *Proceedings,  
864 National Academy of Sciences*, 109(9), 3232–3237. doi:  
865 10.1073/pnas.1109936109

866 Horton RE. 1933. The role of infiltration in the hydrologic  
867 cycle. *Transactions, American Geophysical Union* 14: 446–460.

867 Houyou, Z., Biielders, C. L., Benhorma, H. A., Dellal, A., and Boutemdjet, A., 2014:  
868 Evidence of strong land degradation by wind erosion as a result of rainfed cropping in  
869 the Algerian steppe: A case study at Laghouat, *Land Degradation and Development*,  
870 10.1002/ldr.2295.

871 Howell, M.S., 2009. Mineralogy and micromorphology of an Atacama Desert soil, Chile: A  
872 model for hyperarid pedogenesis. University of Nevada, Las Vegas Theses,  
873 Dissertations, Professional Papers, and Capstones. Paper 52.

874 [Jacobson, M.C., R.J. Charlson, H. Rodhe, G.H., Orians, 2000. \*Earth System Science: From  
875 Biogeochemical Cycles to Global Changes. International Geophysics series 72.  
876 Elsevier 526 pp.\*](#)

877 [Janzen, D. & McDonell, J.J, 2015. \*A stochastic approach to modelling and understanding  
878 hillslope runoff connectivity dynamics. Ecological Modelling\* 298, 64-74.](#)

879 Jenny, H., 1941. *Factors of soil formation: a system of quantitative pedology* . McGraw Hill,  
880 281pp.

881 [Johnson, J.O., S. M. Mudd, B. Pillans, N. A. Spooner, L.K. Fifield, M. J. Kirkby and M.  
882 Gloor, 2014. Quantifying the rate and depth dependence of bioturbation based on  
883 optically-stimulated luminescence \(OSL\) dates and meteoric <sup>10</sup>Be. \*Earth Surface  
884 Processes and Landforms\*, 39\(9\), 1188-1196.](#)

885 Keesstra, S.D., 2007. Impact of natural reforestation on floodplain sedimentation in the  
886 Dragonja valley, Slovenia. *Earth Surface Processes & Landforms*, 32, 49-65. DOI:  
887 10.1002/esp.1360

888 Keesstra, S.D., Bouma, J., Wallinga, J., Jansen, B., Mol, G., Munoz-Rojas, M., Nunes, J.P. &  
889 Montanarella, L., 2016. Soil Science in a changing world: contributions of soil science  
890 for solving global challenges of our time. *Soil, Special Issue*.

891 Keesstra, S.D., Geissen, V., Mosse, K., Piirainen, S., Scudiero, E., Leistra, M. & van Schaik,  
892 L., 2012. Current Opinion on Environmental Sustainability 4, 507-516.

893 [Kirchner, J.W., X. Feng & C. Neal, 2000. Fractal stream chemistry and its implications for  
894 contaminant transport in catchments. \*Nature\*, 403, 524-527 \(3 February 2000\) |  
895 doi:10.1038/35000537](#)

896 Kirkby, M. J.(ed.), 1978, *Hillslope Hydrology*. John Wiley, Chichester. 389pp. ISBN: 978-0-  
897 471-99510-4

**Formatted:** Indent: Left: 0 cm, Hanging: 1 cm, Space Before: 0 pt, After: 0 pt, No bullets or numbering, Font Alignment: Top, Pattern: Clear (Custom Color(RGB(248,248,248)))

**Formatted:** Normal (Web), Font Alignment: Auto, Pattern: Clear

**Formatted:** Normal (Web)

**Formatted:** Font: (Default) Times New Roman, 12 pt

**Formatted:** Font: (Default) Times New Roman, 12 pt

**Formatted:** Font: 12 pt

**Formatted:** Font: (Default) Times New Roman, 12 pt

**Formatted:** Font: (Default) Times New Roman, 12 pt, Not Bold

**Formatted:** Font: (Default) Times New Roman, 12 pt, Not Italic

**Formatted:** Font: (Default) Times New Roman, 12 pt

**Formatted:** Font: (Default) Times New Roman, 12 pt, Not Bold

**Formatted:** Font: (Default) Times New Roman, 12 pt

898 Kirkby, M.J.. 1985. The basis for soil profile modelling in a geomorphic context. *J. Soil*  
899 *Science* 36, 97-121.

900 Kirkby, M.J., 2014. Do not only connect: a model of infiltration-excess overland flow based  
901 on simulation. *Earth Surface Processes and Landforms* 39(7), 952-963. DOI:  
902 10.1002/esp.3556

903 Kirkby, M.J., 2015. Modelling Soil Profiles In Their Landscape Context. Oral presentation &  
904 Abstract at AGU fall conference, San Francisco, Dec2015.

905 Kirkby, M.J., F. Gallart, T. R. Kjeldsen, B. J. Irvine, J. Froebrich, A. Lo Porto, A. De  
906 Girolamo, and the MIRAGE team, 2011. Classifying low flow hydrological regimes at  
907 a regional scale. *Hydrology and Earth System Science*, 15, 1–10. DOI: 10.5194/hess-  
908 15-3741-2011

909 Kirkby, M.J., Irvine, B.J., Jones, R.J.A., Govers, G., & the PESERA team, 2008. The  
910 PESERA coarse scale erosion model for Europe: I – Model rationale and  
911 implementation. *European Journal of Soil Science*. 59(6), 1293-1306. DOI:  
912 10.1111/j.1365-2389.2008.01072.x

913 Knapen, A., J. Poesen, G. Govers, G. Gyssels and J. Nachtergaele, 2007. Resistance of soils  
914 to concentrated flow erosion: A review. *Earth Science Reviews* 80, 75-109.

915 Larsen LG, J. Choi, M.K. Nungesser & J.W. Harvey, 2012. Directional connectivity in  
916 hydrology and ecology *Ecol. Appl* 22, 2204-2220.

917 Lavee, H., Imeson, A.C., & Sarah, P., 1998. The impact of climate change on geomorphology  
918 and desertification along a mediterranean-arid transect. *Land Degradation and*  
919 *Development* 9, 407-422. DOI: 10.1002/(SICI)1099-145X(199809/10)9:5<407::AID-  
920 LDR302>3.0.CO;2-6

921 Lin, H. 2010. Earth's Critical Zone and hydrogeology: concepts, characteristics, and  
922 advances *Hydrol. Earth Syst. Sci.*, 14, 25–4

923 McRae BH, Dickson BG, Keitt TH, Shah VB 2008.. Using circuit theory to model  
924 connectivity in ecology, evolution, and conservation. *Ecology* 89: 2712-2724. DOI:  
925 10.1890/07-1861.1

926 McDonnell, J.J., 2014. The two water worlds hypothesis: ecohydrological separation of water  
927 between streams and trees? *Wiley Interdisciplinary reviews: Water*. 1(4), 323-329.

928 McGuire, K.J & McDonnell, J.J., 2010. Hydrological connectivity of hillslopes and streams:  
929 Characteristic time scales and nonlinearities. *Water Resources research* 26 (10) DOI  
930 10.1029/2010WR009341. DOI: 10.1029/2010WR009341

931 Mazoyer, M & Roudart, L..2006 (English Translation). *A History of World Agriculture:*  
932 *From the Neolithic Age to the Current Crisis*. Monthly Review Press.496pp ISBN-13:  
933 978-1583671214

934 Martin, P. , Hunen, J., Parman, S. and Davidson, J., 2008. Why does plate tectonics occur  
935 only on Earth? *Physics education*, 43(2), 141-150. DOI: 10.1088/0031-9120/43/2/002

936 Montgomery, D.R., 2007. Soil erosion and agricultural sustainability. *Proceedings National*  
937 *Academy of Sciences*. vol. 104 , 13268–13272, doi: 10.1073/pnas.0611508104

938 Montgomery, D.R. and Dietrich, W.E., 1992. Channel initiation and the problem of landscape  
939 scale. *Science* 255, 826-830. DOI: 10.1126/science.255.5046.826

940 Mooney, S.J., Holden, N., Ward, S and Collins, J.F., 1999. Morphological observations of  
941 dye tracer infiltration and by-pass flow in milled peat. *Plant and Soil* 208(2):167-178.  
942 DOI: 10.1023/A:1004538207229

943 Van Oost, K., G. Govers, T. A. Quine, G. Heckrath, J. E. Olesen, S. De Gryze, and R.  
944 Merckx (2005), Landscape-scale modeling of carbon cycling under the impact of soil  
945 redistribution: The role of tillage erosion, *Global Biogeochem. Cycles*, 19, GB4014,  
946 doi:10.1029/2005GB002471.

Formatted: Font: (Default) Times New Roman, 12 pt

Formatted: Font: 12 pt

Formatted: Font: (Default) Times New Roman, 12 pt



- 947 Penuela F.A., Javaux, M & Biielders, C. 2015. How do slope and surface roughness affect  
 948 plot-scale overland flow connectivity?. *Journal of Hydrology*, Vol. 528, p. 192-205.  
 949 doi:10.1016/j.jhydrol.2015.06.031. <http://hdl.handle.net/2078.1/164926>
- 950 Philip, J. R., 1957. The Theory of Infiltration: Sorptivity and Algebraic Infiltration Equation,  
 951 *Soil Sci.*, 84, 257-264
- 952 Philip, J.R., 1969. Theory of infiltration. *Advances in Hydroscience*. v. 5, p. 215-296.
- 953 Pimentel, D., Berger, B., Filiberto, D., Newton, M., Wolfe, B., Karabinakis, E., Clark, S.,  
 954 Poon, E., Abbett, E. & Nandagopal, S., 2004. Water resources: Agricultural and  
 955 environmental issues *Bioscience* 54, 909-918. DOI: 10.1641/0006-  
 956 3568(2004)054[0909:WRAAEI]2.0.CO;2
- 957 Poesen, J.W., Torri, D., & Bunte, K., 1994. Effects of rock fragments on soil erosion by water  
 958 at different spatial scales: a review. *Catena* 23, 141-166. DOI: 10.1016/0341-  
 959 8162(94)90058-
- 960 Prentice, I.C., Cramer, W. Harrison, S.P., Leemans, R., Monserud, R.A. and Solomon, A.M.  
 961 1992. A Global Biome Model Based on Plant Physiology and Dominance, Soil  
 962 Properties and Climate. *Journal of Biogeography*, 19 (2), 117-134. DOI:  
 963 10.2307/2845499
- 964 Reaney, S. M.; Bracken, L. J.; Kirkby, M. J., 2014. The importance of surface controls on  
 965 overland flow connectivity in semi-arid environments: results from a numerical  
 966 experimental approach. *Hydrological Processes* 28,: 2116-2128 . DOI:  
 967 10.1002/hyp.9769
- 968 Richards, L.A., 1931. Capillary conduction of liquids through porous mediums. *Physics* 1 (5):  
 969 318–333
- 970 Riebe, C.S, Kirchner, J.W. and Finkel, R.C, 2003. Long-term rates of chemical weathering  
 971 and physical erosion from cosmogenic nuclides and geochemical mass balance.  
 972 *Geochimica et Cosmochimica Acta*, 67, 4411–4427. DOI: 10.1016/S0016-  
 973 7037(03)00382-X
- 974 Roering, J.J., J.W. Kirchner, and W.E. Dietrich, 2001. Hillslope evolution by nonlinear slope-  
 975 dependent transport: Steady-state morphology and equilibrium adjustment timescales,  
 976 *Journal of Geophysical Research*, v. 106, p. 16,499-16,513. DOI:  
 977 10.1029/2002JB001822
- 978 Rommens, T., Verstraeten G, Poesen, J., Govers, G., van Rompaey, A., Peeters, I. & Lang, A.,  
 979 2005. Soil erosion and sediment deposition in the Belgian loess belt during the  
 980 Holocene: establishing a sediment budget for a small agricultural catchment. *The*  
 981 *Holocene* 15, 1032-1043. DOI: 10.1191/0959683605hl876ra
- 982 [Sadras, Grassini & Steduto, 2011: Status of water use efficiency of main crops. In: The state](#)  
 983 [of world's land and water resources for food and agriculture \(SOLAW\). FAO, Rome](#)  
 984 [and Earthscan, London](#)
- 985 Sanjuan, Y., Gomez-Vilar, A., Nadal-Romero, E., Alvarez-Martinez, J., Arnaez, J., Serrano-  
 986 Muela, M.P., Rubiales, J.M., Gonzalez-Samperiz, P. & Garcia-Ruiz, J.M., 2014. Linking  
 987 land cover changes in the Sub-Alpines and Montane belts to changes in a torrential  
 988 river. *Land Degradation and development* 27, 179-189. DOI: 10.1002/ldr.2294
- 989 Scheiter, S., Langan, L. and Higgins, S.I., 2013. Next-generation dynamic global vegetation  
 990 models: learning from community ecology. *New Phytologist*, 198 (3), 957–969. DOI:  
 991 10.1111/nph.12210
- 992 Schymanski, S.J., Sivapalan, M., Roderick, M.L., Beringer, J. & Hutley, L.B., 2008. An  
 993 optimality-based model of the coupled soil moisture and root dynamics *Hydrology and*  
 994 *Earth System Sciences Discussions*, 12(3), 913-932. DOI: 10.1029/2008WR006841



995 Sivapalan, M. Beven, K. & Wood, E.F>. 1987. On hydrologic similarity: 2. A scaled model  
996 of storm runoff production. *Water Resources Research* 23, 2266-2278. DOI:  
997 10.1029/WR023i012p02266

998 [Stauffer, D. and A. Aharony, 1985. Introduction to percolation theory. Taylor and Francis,  
999 London. 193pp.](#)

1000 [Steffen, W., K. Richardson, J. Rockstrom, S.E. Cornell, I. Fetzer, E.M. Bennett, R. Biggs,  
1001 S.R. Carpenter, W. de Vries, C.A.de Wit, C. Folke, D. Gerten, J. Heinke, G.M. Mace,  
1002 L.M. Persson, V. Ramanathan, B. Reyers & S. Sorlin.2015. Planetary boundaries:  
1003 Guiding human development on a changing planet. \*Science\* 347, Issue 6223,  
1004 DOI: 10.1126/science.1259855](#)

1005 Tarboton, D.G., 2003. Rainfall-runoff processes. Technical report. Utah State University

1006 Tetzlaff, D., Soulsby, C.,& Birkel, C., 2010. Hydrological connectivity and microbiological  
1007 fluxes in montane catchments: the role of seasonality and climatic variability.  
1008 *Hydrological Processes* 24(9), 1231-1235. DOI: 10.1002/hyp.7680

1009 Tromp-van Meerveld, H.J. and J.J. McDonnell. 2006. Threshold relations in subsurface  
1010 stormflow 2: The fill and spill hypothesis: an explanation for observed threshold  
1011 behavior in subsurface stormflow. *Water Resources Research*,  
1012 doi:10.1029/2004WR003800

1013 Tucker, G.E., Lancaster, S., Gasparini, N. & Bras, R., 2001. Landscape erosion and evolution  
1014 modelling, (ed Harmon & Doe) Kluwer Academic/ Plenum, NY. pp 349-388. ISBN 0-  
1015 306-46718-6

1016 [Vitousek, P., Dixon, J.L. & Chadwick, O.A. Biogeochemistry \(2016\) 130: 147.  
1017 doi:10.1007/s10533-016-0249-x](#)

1018 Weiler, M. and F. Naef, 2003. An Experimental Tracer Study of the Role of Macropores in  
1019 Infiltration in Grassland Soils, *Hydrological Processes*, 17: 477-493. . DOI:  
1020 10.1002/hyp.1136

1021 Wright, R.J., Boyer, D.G., Winant, W.M., and Perry, H.D.. 1990. The influence of soil  
1022 factors on yield differences among landscape positions in an Appalachian cornfield.  
1023 *Soil Sci.* 149:375–382. DOI: 10.1097/00010694-199006000-00009.

1024 Youngs, E.G., 1957. Moisture profiles during vertical infiltration. *Soil Science*, 84 (4), 283-  
1025 290.

1026 Zhao, C., Gao, J., Huang, Y., Wang, G., and Zhang, M., 2016: Effects of Vegetation Stems  
1027 on Hydraulics of Overland Flow Under Varying Water Discharges, *Land Degradation  
1028 and Development*, 27, 748-757, 10.1002/ldr.2423.

1029 Zimmer, Y, 2012. Production Cost in the EU and in Third Countries: past Trends, Structures  
1030 and Levels. Workshop on the Outlook for EU Agriculture by COPA, COGECA,  
1031 European Crop Protection & Fertilizers Europe. Brussels

1032

Formatted: Font: (Default) Times New Roman, 12 pt

1033 **Figure Captions**

- 1034 1. Inter-relationships between soil forming factors, ultimately controlled by parent  
1035 material and climate, mediated by water, life and topography over a range of time  
1036 and space scales
- 1037 2. Broad typology of soil types, controlled by net atmospheric inputs (e.g. salt and  
1038 dust) and net water balance (precipitation minus evapotranspiration)
- 1039 3. Modelled evolution of runoff patterns on randomly rough slope of 160x160m.  
1040 Individual hydrographs are shown for points on the lower boundary with different  
1041 catchment areas, parts of the total area of 4096 (64x64). Square shows intensity  
1042 (on log scale) of local overland flow at a time indicated by the heavy arrows on  
1043 the hydrographs below.
- 1044 (a) Early in a 30 mm, 30 minute storm, runoff generated in patches of lowest infiltration  
1045 capacity.
- 1046 (b) As storm rainfall ends, downslope accumulation defines connectivity along strongest  
1047 flow paths
- 1048 4. Perceptual model of water flow pathways in the critical zone  
1049 ~~(b)~~
- 1050 ~~4.~~ 5. Paths of parent material as it progressively weathers and is carried away as  
1051 sediment et and near the soil surface. If a steady state develops over time, the rate of surface  
1052 lowering will be equal to the rate at which the weathering front penetrates into bedrock.
- 1053 ~~5.~~ Prevalence of under nourishment in populations. From FAO et al, 2015
- 1054 ~~6a.~~ Populations that can be supported with available land and water resources, by country.  
1055 Calculation converts available water resources (in mm per year) to number of people that  
1056 can be fed, assuming 600mm is needed to grow a crop. Where water is limiting, this sets  
1057 useable arable area. Where land is limiting, potential arable area is used. Population  
1058 supported then assumes 0.5 Ha if usable arable land is needed per capita. Resources are  
1059 insuffieient below the 1:1 line. Sustainable population assuming rain-fed agriculture. Left  
1060 hand axis is for efficient agriculture; right hand axis for low efficiency. Lines show self-  
1061 sufficiency levels with high (blue) and low efficiency (red) farming.
- 1062 6b: Sustainable population if available rainfall is effectively concentrated by water  
1063 harvesting. Note that some of the countries that appear here had insufficient rainfall for  
1064 any rain-fed farming.
- 1065
- 1066 ~~6.~~ Lines represent levels of full sustainability. A number of countries not shown cannot  
1067 support any rain-fed agriculture based on their average rainfall.
- 1068 ~~7.~~ 7. Renewable water resources (mm of water per year) and arable land available by  
1069 country. Diamonds show actual arable land and circles show potential arable land. The  
1070 horizontal line divides countries with and without enough water to fully utilise their  
1071 arable land.
- 1072 ~~8.~~ 8. Renewable water per capita against population size by country. The lines the  
1073 annual water resources needed to grow food (ca 1200 m<sup>3</sup> per capita) and for domestic  
1074 water supply (a 80 m<sup>3</sup> per capita). Many countries do not have enough water to be food  
1075 secure, and a some lack enough water for domestic use.
- 1076 ~~9.~~ 9. Water harvesting potential in Africa, based on climatic data. The map shows the  
1077 ratio of precipitation to potential evapotranspiration for a 5-month growing season, for  
1078 the worst 25% of years. At values less than 0.2, water harvesting is only practicable in

Formatted: Font: (Default) Times New Roman, 12 pt, Font color: Text 1

Formatted: Normal, No bullets or numbering

Formatted: Indent: Left: 1.27 cm, No bullets or numbering

Formatted: Normal, No bullets or numbering

Formatted: Font: (Default) Times New Roman, 12 pt, Font color: Text 1

Formatted: Normal, Indent: Left: 0.25 cm, No bullets or numbering

Formatted: Font: (Default) Times New Roman, 12 pt, Font color: Text 1

Formatted: Font: (Default) Times New Roman, 12 pt

Formatted: Font: (Default) Times New Roman, 12 pt

Formatted: Font: (Default) Times New Roman, 12 pt

Formatted: Normal, Indent: Left: 0.5 cm, No bullets or numbering

Formatted: Font: (Default) Times New Roman, 12 pt, Font color: Text 1

Formatted: Normal, Indent: Left: 0.75 cm, No bullets or numbering

Formatted: Font: (Default) Times New Roman, 12 pt, Font color: Text 1

Formatted: Font: (Default) Times New Roman, 12 pt, Font color: Text 1

Formatted: Font: (Default) Times New Roman, 12 pt, Font color: Text 1

1079 very favourable situations. Above 1.5, rain-fed farming generally provides an adequate  
1080 crop without water harvesting.

1081 ~~10.~~ 10. The modelled frequency distribution of crop yields for Mekele, northern  
1082 Ethiopia, for a range of ratios of collecting: cropping area (CAR), illustrating the  
1083 greater reliability of crop yields with effective water harvesting.

1084 ~~11.~~ 11. Factors influencing the relationships between water use and the cost of  
1085 food, taking account of energy needs for fertiliser and possible water desalination,  
1086 loss of cultivable land and greenhouse gas emissions.

**Formatted:** Normal, Indent: Left: 1 cm, No bullets or numbering

**Formatted:** Font: (Default) Times New Roman, 12 pt, Font color: Text 1

**Formatted:** Font: (Default) Times New Roman, 12 pt, Font color: Text 1

**Formatted:** Normal, Indent: Left: 1.25 cm, No bullets or numbering
